# Supplementary material for: Biogeographic Patterns of Leaf Element Stoichiometry of Stellera chamaejasme L. in Degraded Grasslands on Inner Mongolia Plateau and Qinghai-Tibetan Plateau
Source: MDPI journal article supplement (doi:10.3390/plants11151943), 2022-07-26

**Table S1** Leaf element contents and stoichiometry of *S. chamaejasme* in different sample sites in this study (Mean  $\pm$  SD, n = 3)

| Sample Sites           |      | Leaf                      |                           |                           |                           |                   |                    |                  |                 |                 |
|------------------------|------|---------------------------|---------------------------|---------------------------|---------------------------|-------------------|--------------------|------------------|-----------------|-----------------|
|                        |      | C (g • kg <sup>-1</sup> ) | N (g • kg <sup>-1</sup> ) | P (g • kg <sup>-1</sup> ) | K (g • kg <sup>-1</sup> ) | C:N               | C:P                | N:P              | N:K             | K:P             |
| Inner Mongolia Plateau | GY   | 496.84 $\pm$ 19.91        | 19.68 $\pm$ 0.79          | 2.11 $\pm$ 0.08           | 5.31 $\pm$ 0.16           | 25.25 $\pm$ 0.00  | 235.13 $\pm$ 0.03  | 9.31 $\pm$ 0.00  | 3.71 $\pm$ 0.20 | 2.51 $\pm$ 0.13 |
|                        | DL   | 512.12 $\pm$ 28.08        | 22.86 $\pm$ 1.41          | 2.78 $\pm$ 0.15           | 5.64 $\pm$ 0.47           | 22.50 $\pm$ 2.62  | 184.86 $\pm$ 20.44 | 8.22 $\pm$ 0.34  | 4.08 $\pm$ 0.58 | 2.04 $\pm$ 0.27 |
|                        | TPSQ | 494.48 $\pm$ 21.19        | 21.09 $\pm$ 0.37          | 2.43 $\pm$ 0.10           | 5.70 $\pm$ 0.73           | 23.46 $\pm$ 0.74  | 268.51 $\pm$ 22.23 | 10.49 $\pm$ 1.07 | 3.75 $\pm$ 0.56 | 2.35 $\pm$ 0.37 |
|                        | SU   | 536.20 $\pm$ 4.56         | 19.13 $\pm$ 1.19          | 1.57 $\pm$ 0.15           | 4.15 $\pm$ 0.34           | 28.10 $\pm$ 1.68  | 342.78 $\pm$ 31.91 | 12.18 $\pm$ 0.43 | 4.65 $\pm$ 0.61 | 2.66 $\pm$ 0.41 |
|                        | SGDL | 530.58 $\pm$ 3.86         | 22.68 $\pm$ 1.53          | 2.30 $\pm$ 0.23           | 5.86 $\pm$ 0.27           | 23.47 $\pm$ 1.75  | 232.17 $\pm$ 23.85 | 9.92 $\pm$ 1.19  | 3.88 $\pm$ 0.43 | 2.57 $\pm$ 0.36 |
|                        | XWQ  | 486.49 $\pm$ 3.51         | 20.52 $\pm$ 2.33          | 1.40 $\pm$ 0.04           | 4.72 $\pm$ 0.08           | 23.94 $\pm$ 3.05  | 346.97 $\pm$ 6.95  | 14.66 $\pm$ 2.00 | 4.35 $\pm$ 0.51 | 3.37 $\pm$ 0.09 |
|                        | BYXL | 451.33 $\pm$ 3.12         | 15.29 $\pm$ 0.50          | 1.42 $\pm$ 0.13           | 5.40 $\pm$ 0.12           | 29.52 $\pm$ 0.97  | 318.26 $\pm$ 33.53 | 10.78 $\pm$ 0.80 | 2.83 $\pm$ 0.09 | 3.81 $\pm$ 0.36 |
|                        | BYH  | 505.43 $\pm$ 2.84         | 19.72 $\pm$ 0.62          | 1.89 $\pm$ 0.15           | 6.10 $\pm$ 0.41           | 25.64 $\pm$ 0.74  | 268.51 $\pm$ 22.23 | 10.49 $\pm$ 1.07 | 3.25 $\pm$ 0.26 | 3.23 $\pm$ 0.37 |
|                        | HTXL | 485.75 $\pm$ 2.96         | 17.39 $\pm$ 0.80          | 1.79 $\pm$ 0.11           | 5.86 $\pm$ 0.36           | 27.93 $\pm$ 1.11  | 271.93 $\pm$ 15.67 | 9.74 $\pm$ 0.29  | 2.97 $\pm$ 0.11 | 3.28 $\pm$ 0.03 |
|                        | FYD  | 479.72 $\pm$ 9.50         | 21.33 $\pm$ 4.82          | 2.76 $\pm$ 0.62           | 6.39                      | 22.49 $\pm$ 7.83  | 173.89 $\pm$ 60.50 | 7.73             | 3.34            | 2.32            |
| Qinghai- Tibet Plateau | YD   | 528.45 $\pm$ 5.46         | 23.48 $\pm$ 1.64          | 1.74 $\pm$ 0.14           | 6.64 $\pm$ 0.41           | 22.58 $\pm$ 1.66  | 305.60 $\pm$ 24.77 | 13.60 $\pm$ 1.73 | 3.55 $\pm$ 0.34 | 3.83 $\pm$ 0.13 |
|                        | TZ   | 498.50 $\pm$ 7.70         | 20.35 $\pm$ 1.79          | 2.13 $\pm$ 0.08           | 5.57 $\pm$ 0.70           | 24.60 $\pm$ 1.73  | 234.73 $\pm$ 8.45  | 9.57 $\pm$ 0.66  | 3.67 $\pm$ 0.15 | 2.62 $\pm$ 0.29 |
|                        | HC   | 497.96 $\pm$ 1.32         | 16.60 $\pm$ 6.76          | 3.19 $\pm$ 0.16           | 9.08 $\pm$ 0.92           | 33.17 $\pm$ 11.85 | 156.60 $\pm$ 8.04  | 5.29 $\pm$ 2.44  | 1.88 $\pm$ 0.94 | 2.85 $\pm$ 0.18 |
|                        | SD   | 507.82 $\pm$ 5.16         | 21.82 $\pm$ 1.93          | 1.77 $\pm$ 0.06           | 7.78 $\pm$ 0.38           | 23.38 $\pm$ 1.90  | 287.56 $\pm$ 9.63  | 12.35 $\pm$ 1.00 | 2.80 $\pm$ 0.20 | 4.40 $\pm$ 0.08 |
|                        | SN   | 492.53 $\pm$ 5.21         | 20.22 $\pm$ 1.20          | 2.30 $\pm$ 0.12           | 8.06 $\pm$ 0.46           | 24.40 $\pm$ 1.27  | 214.05 $\pm$ 11.12 | 8.77 $\pm$ 0.28  | 2.52 $\pm$ 0.26 | 3.50 $\pm$ 0.27 |
|                        | MT   | 502.91 $\pm$ 2.39         | 20.70 $\pm$ 4.79          | 1.40 $\pm$ 0.07           | 8.61 $\pm$ 0.49           | 25.25 $\pm$ 6.18  | 359.69 $\pm$ 17.93 | 14.75 $\pm$ 3.23 | 2.42 $\pm$ 0.63 | 6.15 $\pm$ 0.27 |
|                        | QL   | 524.76 $\pm$ 2.28         | 19.14 $\pm$ 0.91          | 1.99 $\pm$ 0.14           | 7.94 $\pm$ 0.06           | 27.46 $\pm$ 1.41  | 264.21 $\pm$ 17.64 | 9.65 $\pm$ 0.95  | 2.41 $\pm$ 0.12 | 4.00 $\pm$ 0.30 |
|                        | GC   | 483.47 $\pm$ 16.03        | 18.90 $\pm$ 2.50          | 2.25 $\pm$ 0.06           | 6.38 $\pm$ 0.58           | 25.82 $\pm$ 4.18  | 215.19 $\pm$ 10.71 | 8.47 $\pm$ 1.27  | 2.99 $\pm$ 0.47 | 2.84 $\pm$ 0.22 |
|                        | HY   | 490.98 $\pm$ 7.10         | 17.86 $\pm$ 1.24          | 1.98 $\pm$ 0.08           | 6.66 $\pm$ 0.45           | 27.57 $\pm$ 1.99  | 234.54 $\pm$ 9.06  | 8.49 $\pm$ 0.81  | 2.68 $\pm$ 0.02 | 3.38 $\pm$ 0.37 |
|                        | GH   | 504.30 $\pm$ 5.96         | 18.24 $\pm$ 1.37          | 2.15 $\pm$ 0.11           | 6.02 $\pm$ 0.20           | 27.75 $\pm$ 11.99 | 234.54 $\pm$ 9.06  | 8.49 $\pm$ 0.81  | 3.03 $\pm$ 0.25 | 2.80 $\pm$ 0.05 |
|                        | YTL  | 531.11 $\pm$ 13.35        | 22.87 $\pm$ 5.43          | 1.56 $\pm$ 0.11           | 6.92 $\pm$ 0.09           | 23.98 $\pm$ 4.77  | 342.41 $\pm$ 30.76 | 14.89 $\pm$ 4.63 | 3.31 $\pm$ 0.81 | 4.46 $\pm$ 0.27 |
|                        | HK   | 504.30 $\pm$ 5.96         | 20.93 $\pm$ 1.47          | 2.66 $\pm$ 0.07           | 7.65 $\pm$ 0.38           | 24.18 $\pm$ 1.69  | 189.86 $\pm$ 5.43  | 7.87 $\pm$ 0.40  | 2.74 $\pm$ 0.19 | 2.88 $\pm$ 0.09 |
|                        | TD   | 493.22 $\pm$ 7.25         | 21.29 $\pm$ 3.23          | 1.48 $\pm$ 0.11           | 7.39 $\pm$ 0.59           | 23.55 $\pm$ 3.73  | 335.27 $\pm$ 22.54 | 14.51 $\pm$ 2.83 | 2.89 $\pm$ 0.46 | 5.01 $\pm$ 0.21 |
|                        | ZK   | 469.81 $\pm$ 17.14        | 19.93 $\pm$ 2.57          | 2.52 $\pm$ 0.27           | 7.80 $\pm$ 0.49           | 23.79 $\pm$ 2.58  | 188.10 $\pm$ 26.72 | 7.99 $\pm$ 1.68  | 2.57 $\pm$ 0.46 | 3.10 $\pm$ 0.14 |
|                        | HN   | 529.02 $\pm$ 5.35         | 21.15 $\pm$ 2.01          | 2.95 $\pm$ 0.24           | 8.10 $\pm$ 0.38           | 25.15 $\pm$ 2.15  | 180.40 $\pm$ 16.35 | 7.20 $\pm$ 0.81  | 2.61 $\pm$ 0.12 | 2.76 $\pm$ 0.25 |
|                        | LQ   | 472.52 $\pm$ 10.22        | 16.08 $\pm$ 0.50          | 1.93 $\pm$ 0.10           | 6.11 $\pm$ 0.46           | 29.42 $\pm$ 1.57  | 245.32 $\pm$ 13.68 | 8.35 $\pm$ 0.54  | 2.64 $\pm$ 0.16 | 3.17 $\pm$ 01.6 |
|                        | REG  | 516.58 $\pm$ 5.43         | 22.23 $\pm$ 0.54          | 2.87 $\pm$ 0.28           | 6.47 $\pm$ 0.19           | 23.25 $\pm$ 0.64  | 181.49 $\pm$ 18.58 | 7.80 $\pm$ 0.68  | 3.44 $\pm$ 0.02 | 2.27 $\pm$ 0.19 |
|                        | TK   | 466.90 $\pm$ 32.38        | 18.42 $\pm$ 1.16          | 2.09 $\pm$ 0.21           | 6.35 $\pm$ 0.14           | 25.37 $\pm$ 1.42  | 223.94 $\pm$ 13.30 | 8.83 $\pm$ 0.40  | 2.90 $\pm$ 0.23 | 3.06 $\pm$ 0.38 |
|                        | HZ   | 465.01 $\pm$ 16.53        | 18.67 $\pm$ 2.69          | 3.01 $\pm$ 0.22           | 5.98 $\pm$ 0.51           | 25.36 $\pm$ 4.74  | 154.99 $\pm$ 10.23 | 6.26 $\pm$ 1.34  | 3.15 $\pm$ 0.65 | 1.99 $\pm$ 0.08 |

**Table S2** Soil physiochemical properties in different sample sites in this study (Mean  $\pm$  SD, n = 3, n<sub>FYD</sub>=1)

| Sample Sites           |      | Soil                      |                           |                           |                           |                   |                    |                 |                 |                   |
|------------------------|------|---------------------------|---------------------------|---------------------------|---------------------------|-------------------|--------------------|-----------------|-----------------|-------------------|
|                        |      | C (g • kg <sup>-1</sup> ) | N (g • kg <sup>-1</sup> ) | P (g • kg <sup>-1</sup> ) | K (g • kg <sup>-1</sup> ) | C:N               | C:P                | N:P             | N:K             | K:P               |
| Inner Mongolia Plateau | GY   | 74.86 $\pm$ 1.22          | 5.56 $\pm$ 0.30           | 0.75 $\pm$ 0.02           | 14.37 $\pm$ 1.40          | 12.61 $\pm$ 0.89  | 95.60 $\pm$ 3.80   | 7.58 $\pm$ 0.24 | 0.37 $\pm$ 0.03 | 20.72 $\pm$ 1.52  |
|                        | DL   | 60.57 $\pm$ 4.68          | 4.46 $\pm$ 0.31           | 0.63 $\pm$ 0.01           | 22.84 $\pm$ 0.30          | 13.60 $\pm$ 0.91  | 97.01 $\pm$ 9.47   | 7.14 $\pm$ 0.65 | 0.20 $\pm$ 0.02 | 36.53 $\pm$ 0.40  |
|                        | TPSQ | 29.57 $\pm$ 3.98          | 2.93 $\pm$ 0.57           | 0.41 $\pm$ 0.035          | 22.50 $\pm$ 1.57          | 10.17 $\pm$ 0.75  | 72.77 $\pm$ 5.44   | 7.18 $\pm$ 0.79 | 0.13 $\pm$ 0.03 | 55.92 $\pm$ 8.23  |
|                        | SU   | 13.57 $\pm$ 6.42          | 1.42 $\pm$ 0.33           | 0.30 $\pm$ 0.03           | 19.36 $\pm$ 0.22          | 9.20 $\pm$ 2.11   | 44.23 $\pm$ 16.64  | 4.71 $\pm$ 0.65 | 0.07 $\pm$ 0.02 | 64.88 $\pm$ 5.39  |
|                        | SGDL | 53.15 $\pm$ 16.62         | 4.50 $\pm$ 1.42           | 0.54 $\pm$ 0.02           | 18.30 $\pm$ 1.03          | 11.82 $\pm$ 1.03  | 99.35 $\pm$ 30.87  | 8.39 $\pm$ 2.55 | 0.24 $\pm$ 0.07 | 34.21 $\pm$ 2.70  |
|                        | XWQ  | 5.87 $\pm$ 1.55           | 0.76 $\pm$ 0.13           | 0.21 $\pm$ 0.02           | 0.95 $\pm$ 0.68           | 7.72 $\pm$ 1.41   | 29.15 $\pm$ 7.78   | 3.74 $\pm$ 0.40 | 1.05 $\pm$ 0.54 | 4.54 $\pm$ 2.85   |
|                        | BYXL | 84.74 $\pm$ 0.89          | 5.26 $\pm$ 0.15           | 0.78 $\pm$ 0.09           | 19.97 $\pm$ 1.58          | 16.26 $\pm$ 0.35  | 98.28 $\pm$ 11.26  | 6.05 $\pm$ 0.70 | 0.24 $\pm$ 0.02 | 25.05 $\pm$ 1.08  |
|                        | BYH  | 13.80 $\pm$ 0.85          | 1.5 $\pm$ 0.08            | 0.34 $\pm$ 0.03           | 18.69 $\pm$ 0.71          | 9.20 $\pm$ 0.21   | 40.61 $\pm$ 2.52   | 4.41 $\pm$ 0.18 | 0.08 $\pm$ 0.00 | 55.02 $\pm$ 3.14  |
|                        | HTXL | 27.29 $\pm$ 0.659         | 2.72 $\pm$ 0.091          | 0.35 $\pm$ 0.02           | 19.30 $\pm$ 0.54          | 9.96 $\pm$ 0.10   | 81.14 $\pm$ 3.76   | 8.15 $\pm$ 0.38 | 0.15 $\pm$ 0.01 | 54.31 $\pm$ 2.35  |
|                        | FYD  | 49.64                     | 4.96                      | 0.66                      | 24.60                     | 9.97              | 75.06              | 7.53            | 0.20            | 37.33             |
| Qinghai- Tibet Plateau | YD   | 53.88 $\pm$ 4.59          | 0.58 $\pm$ 0.03           | 0.58 $\pm$ 0.03           | 25.70 $\pm$ 2.38          | 11.31 $\pm$ 1.90  | 93.56 $\pm$ 7.92   | 8.49 $\pm$ 2.10 | 0.19 $\pm$ 0.05 | 44.53 $\pm$ 1.90  |
|                        | TZ   | 67.00 $\pm$ 3.18          | 5.05 $\pm$ 0.05           | 0.67 $\pm$ 0.06           | 29.47 $\pm$ 1.52          | 13.32 $\pm$ 0.77  | 99.91 $\pm$ 5.71   | 7.50 $\pm$ 0.15 | 0.17 $\pm$ 0.02 | 36.88 $\pm$ 1.53  |
|                        | HC   | 38.07 $\pm$ 7.03          | 3.02 $\pm$ 0.88           | 0.56 $\pm$ 0.04           | 17.59 $\pm$ 0.63          | 12.88 $\pm$ 1.40  | 67.73 $\pm$ 7.62   | 5.34 $\pm$ 1.18 | 0.17 $\pm$ 0.05 | 31.55 $\pm$ 1.63  |
|                        | SD   | 50.48 $\pm$ 8.36          | 3.47 $\pm$ 0.91           | 0.55 $\pm$ 0.05           | 17.37 $\pm$ 0.29          | 14.84 $\pm$ 2.27  | 92.19 $\pm$ 17.81  | 6.29 $\pm$ 1.55 | 0.20 $\pm$ 0.05 | 31.65 $\pm$ 2.64  |
|                        | SN   | 66.17 $\pm$ 17.91         | 5.02 $\pm$ 2.71           | 0.60 $\pm$ 0.06           | 25.17 $\pm$ 2.35          | 14.61 $\pm$ 5.12  | 109.17 $\pm$ 22.77 | 8.31 $\pm$ 4.20 | 0.21 $\pm$ 0.13 | 42.16 $\pm$ 5.87  |
|                        | MT   | 30.90 $\pm$ 0.43          | 3.38 $\pm$ 0.02           | 0.64 $\pm$ 0.02           | 19.78 $\pm$ 0.90          | 9.13 $\pm$ 0.17   | 48.05 $\pm$ 2.27   | 5.26 $\pm$ 0.15 | 0.17 $\pm$ 0.01 | 30.76 $\pm$ 1.74  |
|                        | QL   | 75.00 $\pm$ 5.43          | 7.43 $\pm$ 0.78           | 0.71 $\pm$ 0.01           | 29.52 $\pm$ 3.37          | 10.18 $\pm$ 1.31  | 106.00 $\pm$ 8.40  | 10.5 $\pm$ 1.22 | 0.25 $\pm$ 0.00 | 41.75 $\pm$ 5.22  |
|                        | GC   | 51.69 $\pm$ 1.28          | 3.37 $\pm$ 0.41           | 0.66 $\pm$ 0.02           | 24.81 $\pm$ 1.17          | 15.49 $\pm$ 1.96  | 78.72 $\pm$ 1.39   | 5.13 $\pm$ 0.62 | 0.14 $\pm$ 0.02 | 37.76 $\pm$ 0.67  |
|                        | HY   | 12.59 $\pm$ 1.54          | 0.40 $\pm$ 0.26           | 0.20 $\pm$ 0.03           | 16.61 $\pm$ 0.45          | 38.90 $\pm$ 16.62 | 64.06 $\pm$ 9.57   | 2.04 $\pm$ 1.40 | 0.02 $\pm$ 0.02 | 85.39 $\pm$ 16.20 |
|                        | GH   | 45.32 $\pm$ 5.57          | 3.73 $\pm$ 0.49           | 0.58 $\pm$ 0.01           | 23.04 $\pm$ 1.74          | 12.16 $\pm$ 0.10  | 78.70 $\pm$ 10.60  | 6.48 $\pm$ 0.92 | 0.16 $\pm$ 0.02 | 40.00 $\pm$ 3.50  |
|                        | YTL  | 9.82 $\pm$ 2.51           | 0.24 $\pm$ 0.13           | 0.40 $\pm$ 0.05           | 20.74 $\pm$ 0.04          | 45.21 $\pm$ 11.73 | 24.87 $\pm$ 8.20   | 0.61 $\pm$ 0.39 | 0.01 $\pm$ 0.01 | 52.13 $\pm$ 6.41  |
|                        | HK   | 74.42 $\pm$ 8.91          | 5.60 $\pm$ 0.96           | 0.57 $\pm$ 0.04           | 26.12 $\pm$ 5.75          | 13.38 $\pm$ 1.17  | 130.24 $\pm$ 16.69 | 9.77 $\pm$ 1.42 | 0.22 $\pm$ 0.07 | 45.48 $\pm$ 8.34  |
|                        | TD   | 35.87 $\pm$ 6.64          | 3.34 $\pm$ 0.78           | 0.58 $\pm$ 0.04           | 14.86 $\pm$ 1.14          | 10.82 $\pm$ 0.77  | 62.01 $\pm$ 15.29  | 5.79 $\pm$ 1.76 | 0.22 $\pm$ 0.05 | 25.52 $\pm$ 2.67  |
|                        | ZK   | 62.19 $\pm$ 9.82          | 5.16 $\pm$ 0.93           | 0.60 $\pm$ 0.05           | 17.21 $\pm$ 0.58          | 12.10 $\pm$ 1.10  | 104.79 $\pm$ 19.35 | 8.65 $\pm$ 1.39 | 0.30 $\pm$ 0.06 | 29.01 $\pm$ 3.48  |
|                        | HN   | 64.25 $\pm$ 10.06         | 5.29 $\pm$ 0.21           | 0.73 $\pm$ 0.11           | 16.58 $\pm$ 1.63          | 12.14 $\pm$ 1.62  | 89.07 $\pm$ 19.05  | 7.31 $\pm$ 0.99 | 0.32 $\pm$ 0.02 | 22.75 $\pm$ 1.43  |
|                        | LQ   | 53.95 $\pm$ 7.05          | 4.58 $\pm$ 0.36           | 0.72 $\pm$ 0.03           | 26.40 $\pm$ 0.25          | 11.76 $\pm$ 0.60  | 75.40 $\pm$ 10.66  | 6.40 $\pm$ 0.61 | 0.17 $\pm$ 0.02 | 36.88 $\pm$ 1.53  |
|                        | REG  | 38.43 $\pm$ 7.74          | 3.57 $\pm$ 1.13           | 0.82 $\pm$ 0.12           | 30.55 $\pm$ 0.99          | 11.09 $\pm$ 1.60  | 48.08 $\pm$ 13.94  | 4.50 $\pm$ 1.73 | 0.12 $\pm$ 0.03 | 37.89 $\pm$ 6.11  |
|                        | TK   | 44.14 $\pm$ 14.63         | 3.48 $\pm$ 0.92           | 0.72 $\pm$ 0.04           | 22.75 $\pm$ 0.88          | 12.54 $\pm$ 0.83  | 61.89 $\pm$ 21.63  | 4.88 $\pm$ 1.36 | 0.15 $\pm$ 0.05 | 31.85 $\pm$ 2.10  |
|                        | HZ   | 50.20 $\pm$ 14.92         | 3.66 $\pm$ 0.61           | 0.64 $\pm$ 0.06           | 18.03 $\pm$ 0.93          | 13.52 $\pm$ 2.18  | 79.90 $\pm$ 29.31  | 5.5 $\pm$ 1.38  | 0.20 $\pm$ 0.03 | 28.23 $\pm$ 2.75  |

| Sample Sites           |      | Soil                     |                          |                          |                          |            |            |                            |
|------------------------|------|--------------------------|--------------------------|--------------------------|--------------------------|------------|------------|----------------------------|
|                        |      | AP                       | AK                       | AN                       | NN                       | WC         | pH         | Ec                         |
|                        |      | (mg • kg <sup>-1</sup> ) |            |            | ( μ s • cm <sup>-1</sup> ) |
| Inner Mongolia Plateau | GY   | 6.62±2.26                | 97±18.36                 | 12.03±0.73               | 9.93±0.36                | 0.21±0.02  | 8.40±0.31  | 813±172.53                 |
|                        | DL   | 3.97±2.59                | 179.67±79.22             | 12.49±3.70               | 20.13±7.26               | 0.20±0.01  | 8.46±0.049 | 587.67±170.53              |
|                        | TPSQ | 4.62±1.75                | 225.67±86.59             | 29.13±3.70               | 5.66±1.57                | 0.07±0.01  | 7.52±0.32  | 83±20.95                   |
|                        | SU   | 2.50±1.13                | 86.67±37.07              | 9.37±0.77                | 6.37±1.55                | 0.05±0.00  | 7.68±0.047 | 87±45.13                   |
|                        | SGDL | 6.93±1.23                | 84.33±40.61              | 14.13±2.83               | 12.81±3.22               | 0.19±0.03  | 7.94±0.09  | 714.67±219.54              |
|                        | XWQ  | 2.36±0.08                | 109.67±15.26             | 12.33±1.51               | 4.32±0.28                | 0.04±0.01  | 8.03±0.32  | 48.33±11.93                |
|                        | BYXL | 5.30±1.72                | 279.67±260.93            | 34.33±13.223             | 83.35±35.44              | 0.14       | 7.64±0.29  | 874.5±30.41                |
|                        | BYH  | 2.54±1.42                | 155.67±24.01             | 21.04±1.31               | 3.13±0.90                | 0.05±0.00  | 6.923±0.06 | 40±6.56                    |
|                        | HTXL | 2.81±0.24                | 240±36.7                 | 28.73±3.64               | 6.14±1.83                | 0.19       | 6.85±0.17  | 117.07±14.67               |
|                        | FYD  | 4.85                     | 286.00                   | 20.28                    | 11.65                    | 0.20       | 6.86       | 118.60                     |
| Qinghai- Tibet Plateau | YD   | 6.75 ±1.38               | 89.33±49.41              | 42.43±2.25               | 10.42±3.12               | 0.26 ±0.04 | 7.81 ±0.22 | 195.00±36.76               |
|                        | TZ   | 4.85 ±2.84               | 118.00±67.56             | 13.49±5.25               | 16.75±3.54               | 0.28±0.01  | 8.26 ±0.09 | 425.33±254.03              |
|                        | HC   | 6.75±1.08                | 222.33±102.05            | 21.45±4.00               | 14.41±2.60               | 0.18±0.03  | 8.15±0.08  | 178.67±4.73                |
|                        | SD   | 5.03 ±1.04               | 179.67±29.02             | 13.74±1.88               | 10.79±1.77               | 0.16 ±0.02 | 8.32±0.05  | 192.00±10.82               |
|                        | SN   | 7.61±3.47                | 137.51±39.85             | 14.74±2.29               | 13.41±1.67               | 0.24 ±0.01 | 8.33 ±0.04 | 207.00 ±30.32              |
|                        | MT   | 5.94 ±1.89               | 367.33±51.23             | 24.77±18.46              | 22.03±3.60               | 0.20±0.01  | 7.81 ±0.12 | 205.33±21.03               |
|                        | QL   | 7.70±2.19                | 369.33±26.10             | 21.02±0.45               | 18.35±2.83               | 0.35 ±0.02 | 7.92 ±0.11 | 243.00 ±30.05              |
|                        | GC   | 6.62 ±1.51               | 407.33±16.50             | 16.75±5.52               | 14.95 ±0.60              | 0.18 ±0.01 | 8.22 ±0.18 | 191.67 ±7.77               |
|                        | HY   | 3.81±1.41                | 97.89±9.77               | 16.04±1.62               | 5.10 ±1.45               | 0.03 ±0.01 | 8.81 ±0.15 | 76.33 ±3.21                |
|                        | GH   | 5.39 ±0.95               | 188.33±82.48             | 14.64±2.93               | 15.83 ±0.96              | 0.16±0.00  | 8.19±0.19  | 168.00±22.27               |
|                        | YTL  | 3.04±0.83                | 86.67±34.02              | 7.64±3.05                | 6.01±1.02                | 0.06±0.02  | 8.30 ±0.05 | 128.33±4.51                |
|                        | HK   | 6.93±0.31                | 63.67±11.24              | 25.59±2.68               | 12.60 ±0.92              | 0.31 ±0.04 | 8.28 ±0.09 | 192.67 ±13.65              |
|                        | TD   | 2.72 ±0.90               | 134.00±53.70             | 12.02±3.74               | 14.57±2.13               | 0.17 ±0.01 | 8.27 ±0.15 | 155.67 ±26.63              |
|                        | ZK   | 7.88±0.16                | 179.33±78.83             | 22.20±0.78               | 12.89 ±4.41              | 0.24 ±0.00 | 7.87 ±0.01 | 226.67 ±85.91              |
|                        | HN   | 10.42±3.43               | 207.67±36.14             | 16.34±1.97               | 18.19±6.42               | 0.23±0.03  | 7.90 ±0.11 | 213.33±13.20               |
|                        | LQ   | 3.90±0.76                | 205.33±38.28             | 20.83±5.02               | 13.22±4.73               | 0.26±0.02  | 7.98±0.05  | 184.00±10.44               |
|                        | REG  | 4.76 ±0.55               | 196.67±98.90             | 12.34±4.60               | 11.35±1.88               | 0.23 ±0.01 | 7.89 ±0.11 | 202.00±21.63               |
|                        | TK   | 4.71±1.47                | 42.33±23.16              | 18.95±0.96               | 5.96 ±0.47               | 0.23±0.02  | 6.82 ±0.37 | 56.67±2.31                 |
|                        | HZ   | 6.03 ±1.68               | 64.33±53.14              | 27.01±6.09               | 9.18 ±4.73               | 0.21 ±0.01 | 7.75±0.06  | 243.67±37.07               |

**Table S3** Relationship between *S. chamaejasme* leaf stoichiometry and soil physicochemical properties in Northern China (n = 29 sites, Pearson correlations). Significant correlation is indicated by an \* ( $P < 0.05$ ).

|                         | Leaf C  | Leaf N  | Leaf P  | Leaf K  | Leaf C:N | Leaf C:P | Leaf N:P | Leaf N:K | Leaf K:P |
|-------------------------|---------|---------|---------|---------|----------|----------|----------|----------|----------|
| <b>Soil C</b>           | -18.27% | -7.46%  | 32.91%  | 20.65%  | 1.23%    | -41.00%* | -41.43%* | -27.93%  | -17.84%  |
| <b>Soil N</b>           | -6.84%  | 1.42%   | 33.63%  | 26.88%  | -4.55%   | -39.55%* | -38.01%* | -27.44%  | -13.48%  |
| <b>Soil P</b>           | -18.04% | -3.07%  | 36.04%  | 26.50%  | -3.62%   | -39.05%* | -36.92%* | -32.17%  | -8.86%   |
| <b>Soil K</b>           | 13.94%  | 5.49%   | 27.48%  | 15.60%  | 1.58%    | -33.14%  | -34.12%  | -19.02%  | -15.60%  |
| <b>Soil C:N</b>         | 10.00%  | 4.64%   | -13.27% | 8.04%   | 1.07%    | 14.15%   | 14.61%   | -11.04%  | 16.98%   |
| <b>Soil C:P</b>         | -13.02% | -5.35%  | 32.08%  | 19.49%  | 0.80%    | -42.41%* | -42.71%* | -24.97%  | -21.84%  |
| <b>Soil N:P</b>         | 0.23%   | 5.78%   | 27.21%  | 17.50%  | -7.05%   | -33.68%  | -31.76%  | -13.87%  | -17.57%  |
| <b>Soil N:K</b>         | -17.30% | 5.85    | -8.91   | -15.10  | -16.77%  | 10.75%   | 16.44%   | 22.52%   | -2.85%   |
| <b>Soil K:P</b>         | 26.18%  | -6.47   | -8.05   | -10.24  | 20.41%   | 3.87%    | -4.88%   | 3.85%    | -6.53%   |
| <b>Soil available P</b> | 10.11%  | 7.57%   | 51.31%* | 55.79%* | -5.44%   | -49.76%* | -45.28%* | -45.84%* | -10.60%  |
| <b>Soil available K</b> | -12.79% | -23.16% | -0.63%  | 29.47%  | 22.58%   | -0.24%   | -8.26%   | -38.57%* | 24.78%   |
| <b>Soil ammonium N</b>  | -31.40% | -22.06% | -0.05%  | 11.19%  | 14.48%   | -4.38%   | -8.64%   | -27.29%  | 9.09%    |
| <b>Soil nitrate N</b>   | -33.42% | -36.38% | -16.41% | -1.30%  | 32.67%   | 14.55%   | 1.12%    | -20.79%  | 17.82%   |
| <b>Soil WC</b>          | -2.70%  | 4.86%   | 36.81%* | 40.87%* | -7.27%   | -40.77%* | -36.55%  | -38.40%* | -5.66%   |
| <b>Soil pH</b>          | 24.92%  | 16.07%  | 2.61%   | 20.08%  | -6.21%   | 1.89%    | 6.34%    | -6.51%   | 11.16%   |
| <b>Soil Ec</b>          | -6.50%  | -2.94%  | 3.03%   | -23.17% | 3.88%    | -6.12%   | -9.18%   | 16.59%   | -15.80%  |

**Table S4** Summary of linear mixed effects model analyzing the effects of soil, MAT and MAP on variation of C, N, P, K concentrations in *S. chamaejasme* leaves, using Soil, MAP, MAT and their interaction as fixed effects. Region was taken as a random factor

| Element contents | Parameter           | df     | SS         | F-value | P-value   | Deviation explained (%) |
|------------------|---------------------|--------|------------|---------|-----------|-------------------------|
| Leaf C           | Soil                | (1,21) | 0.00033314 | 0.7422  | 0.3987    | 17.49                   |
|                  | MAP                 | (1,21) | 0.00024345 | 0.5424  | 0.4696    | 46.46                   |
|                  | MAT                 | (1,21) | 0.00030390 | 0.6770  | 0.4199    | 13.89                   |
|                  | Inter(Soil:MAP)     | (1,21) | 0.00054312 | 1.2100  | 0.2838    |                         |
|                  | Inter(Soil:MAT)     | (1,21) | 0.00000022 | 0.0005  | 0.9827    | 22.16                   |
|                  | Inter(MAP:MAT)      | (1,21) | 0.00000504 | 0.0112  | 0.9166    |                         |
|                  | Inter(Soil:MAP:MAT) | (1,21) | 0.00000017 | 0.0004  | 0.9847    |                         |
| Leaf N           | Soil                | (1,21) | 0.00024636 | 0.0855  | 0.7729    | 6.11                    |
|                  | MAP                 | (1,21) | 0.00000483 | 0.0017  | 0.9677    | 15.28                   |
|                  | MAT                 | (1,21) | 0.00144192 | 0.5001  | 0.4872    | 72.62                   |
|                  | Inter(Soil:MAP)     | (1,21) | 0.00009122 | 0.0316  | 0.8605    |                         |
|                  | Inter(Soil:MAT)     | (1,21) | 0.00002671 | 0.0093  | 0.9242    | 6.99                    |
|                  | Inter(MAP:MAT)      | (1,21) | 0.00131536 | 0.4562  | 0.5068    |                         |
|                  | Inter(Soil:MAP:MAT) | (1,21) | 0.00000554 | 0.0019  | 0.9654    |                         |
| Leaf P           | Soil                | (1,21) | 0.038602   | 3.7802  | 0.06538   | 29.95                   |
|                  | MAP                 | (1,21) | 0.018317   | 1.7938  | 0.19478   | 36.49                   |
|                  | MAT                 | (1,21) | 0.017602   | 1.7237  | 0.20339   | 11.53                   |
|                  | Inter(Soil:MAP)     | (1,21) | 0.010788   | 1.0565  | 0.31572   |                         |
|                  | Inter(Soil:MAT)     | (1,21) | 0.000936   | 0.0917  | 0.76506   | 22.03                   |
|                  | Inter(MAP:MAT)      | (1,21) | 0.009449   | 0.9253  | 0.34704   |                         |
|                  | Inter(Soil:MAP:MAT) | (1,21) | 0.004360   | 0.4269  | 0.52059   |                         |
| Leaf K           | Soil                | (1,21) | 0.0078280  | 2.9705  | 0.09992   | 11.98                   |
|                  | MAP                 | (1,21) | 0.0211776  | 8.0362  | 0.01023 * | 24.70                   |
|                  | MAT                 | (1,21) | 0.0074617  | 2.8315  | 0.10757   | 51.46                   |
|                  | Inter(Soil:MAP)     | (1,21) | 0.0046609  | 1.7687  | 0.19840   |                         |
|                  | Inter(Soil:MAT)     | (1,21) | 0.0005863  | 0.2225  | 0.64211   | 11.85                   |
|                  | Inter(MAP:MAT)      | (1,21) | 0.0026013  | 0.9871  | 0.33182   |                         |
|                  | Inter(Soil:MAP:MAT) | (1,21) | 0.0009943  | 0.3773  | 0.54596   |                         |

Note: Firstly, the soil data (soil C, N, P, K, AP, AK, AN, NN, WC, pH, Ec) is processed by principal component analysis (PCA), then, the number of first axis is used as Soil parameter. Leaf C, N, P, K and climatic data (MAP and MATA) heterogeneity was log-transformed to linearized the data.

**Table S5** Summary of the total effects on the leaf P and K of *S. chamaejasme* in Qinghai Tibet Plateau (QT) and Inner Mongolia Plateau (IM). Significant effect is indicated by an \* ( $P < 0.05$ ).

| Leaf elements | Relationships    | QT      |          |        | IM     |          |       |
|---------------|------------------|---------|----------|--------|--------|----------|-------|
|               |                  | Direct  | Indirect | Total  | Direct | Indirect | Total |
| P             | Climate → Soil   | 0.369   | 0        | 0.369  | 0.682* | 0        | 0.682 |
|               | Climate → Leaf P | -0.456  | 0.192    | -0.264 | 0.665  | 0.123    | 0.788 |
|               | Soil → Leaf P    | 0.519*  | 0        | 0.519  | 0.180  | 0        | 0.180 |
| K             | Climate → Soil   | 0.331   | 0        | 0.331  | 0.590  | 0        | 0.590 |
|               | Climate → Leaf K | -0.476* | -0.127   | -0.604 | 0.248  | 0.181    | 0.428 |
|               | Soil → Leaf K    | -0.385  | 0        | -0.385 | 0.306  | 0        | 0.306 |

**Table S6** The geographical and climatic information associated with the sample sites in this study

| Sample Sites              |      | Latitude |               | Altitude (m) | Mean Annual<br>Precipitation(m<br>m) | Mean Annual<br>temperature(°C) |
|---------------------------|------|----------|---------------|--------------|--------------------------------------|--------------------------------|
|                           |      | (N)      | Longitude (E) |              |                                      |                                |
| Inner Mongolia<br>Plateau | GY   | 41.75    | 115.68        | 1380         | 354.77                               | 3.69                           |
|                           | DL   | 41.81    | 116.09        | 1440         | 364.97                               | 3.71                           |
|                           | TPSQ | 41.82    | 115.30        | 1330         | 346.20                               | 3.62                           |
|                           | SU   | 42.35    | 116.05        | 1310         | 348.86                               | 3.30                           |
|                           | SGDL | 42.67    | 115.95        | 1320         | 330.78                               | 3.24                           |
|                           | XWQ  | 44.52    | 117.39        | 1060         | 314.09                               | 2.73                           |
|                           | BYXL | 43.76    | 116.79        | 1270         | 315.13                               | 3.57                           |
|                           | BYH  | 44.77    | 118.16        | 1130         | 338.60                               | 3.07                           |
|                           | HTXL | 43.42    | 116.13        | 1300         | 302.00                               | 3.32                           |
|                           | FYD  | 41.34    | 115.84        | 1535         | 368.29                               | 4.28                           |
| Qinghai- Tibet<br>Plateau | YD   | 36.83    | 103.02        | 2770         | 397.87                               | 2.97                           |
|                           | TZ   | 37.21    | 102.77        | 2910         | 409.07                               | 1.29                           |
|                           | HC   | 38.04    | 101.56        | 2790         | 211.86                               | 7.42                           |
|                           | SD   | 38.45    | 101.20        | 2590         | 184.31                               | 7.24                           |
|                           | SN   | 38.80    | 99.68         | 2352         | 143.84                               | 8.19                           |
|                           | MT   | 38.47    | 100.48        | 2450         | 172.12                               | 7.49                           |
|                           | QL   | 38.09    | 100.34        | 2970         | 306.79                               | 4.72                           |
|                           | GC   | 37.25    | 100.36        | 3230         | 309.93                               | 4.54                           |
|                           | HY   | 37.16    | 100.54        | 3280         | 316.20                               | 4.62                           |
|                           | GH   | 36.63    | 100.86        | 3380         | 324.25                               | 4.63                           |
|                           | YTL  | 36.36    | 100.72        | 2920         | 326.19                               | 4.36                           |
|                           | HK   | 36.18    | 100.56        | 2920         | 337.76                               | 4.06                           |
|                           | TD   | 35.26    | 100.53        | 3080         | 437.63                               | 2.67                           |
|                           | ZK   | 35.25    | 101.03        | 3480         | 448.18                               | 3.00                           |
|                           | HN   | 34.56    | 101.90        | 3500         | 565.56                               | 2.82                           |
|                           | LQ   | 34.63    | 102.44        | 3100         | 570.41                               | 2.79                           |
|                           | REG  | 34.09    | 102.73        | 3180         | 581.52                               | 2.70                           |
|                           | TK   | 33.35    | 102.50        | 3450         | 587.53                               | 6.30                           |
|                           | HZ   | 34.84    | 103.01        | 3180         | 549.36                               | 3.47                           |

**Table S7** Eigenvalues of the soil PCA

|                  | Dim.1       | Dim.2        | Dim.3        |
|------------------|-------------|--------------|--------------|
| Soil C           | 0.951833918 | 0.17592561   | 0.001408344  |
| Soil N           | 0.948442603 | -0.01691258  | -0.117697961 |
| Soil P           | 0.876422966 | 0.006796241  | -0.070848591 |
| Soil K           | 0.548248139 | -0.361333737 | -0.361518754 |
| Soil available P | 0.729714855 | 0.090356356  | -0.214290518 |
| Soil available K | 0.348820193 | -0.393338992 | 0.298437622  |
| Soil ammonium N  | 0.3371304   | -0.608668314 | 0.356402949  |
| Soil nitrate N   | 0.542945037 | 0.111331856  | 0.753622997  |
| Soil WC          | 0.843821733 | -0.124203841 | -0.415628277 |
| Soil pH          | 0.068389758 | 0.794001662  | -0.200996436 |
| Soil Ec          | 0.568393102 | 0.540578085  | 0.453887649  |

**Table S8** Loadings of the soil PCA

|                  | Dim.1       | Dim.2        | Dim.3        | Dim.4        | Dim.5        |
|------------------|-------------|--------------|--------------|--------------|--------------|
| Soil C           | 0.951833918 | 0.17592561   | 0.001408344  | -0.124669386 | -0.015735198 |
| Soil N           | 0.948442603 | -0.01691258  | -0.117697961 | -0.105047464 | 0.028368126  |
| Soil P           | 0.876422966 | 0.006796241  | -0.070848591 | 0.126340077  | -0.190794411 |
| Soil K           | 0.548248139 | -0.361333737 | -0.361518754 | 0.284590289  | -0.420972227 |
| Soil available P | 0.729714855 | 0.090356356  | -0.214290518 | -0.116243049 | 0.537969641  |
| Soil available K | 0.348820193 | -0.393338992 | 0.298437622  | 0.706365468  | 0.310669133  |
| Soil ammonium N  | 0.3371304   | -0.608668314 | 0.356402949  | -0.425586385 | 0.204506267  |
| Soil nitrate N   | 0.542945037 | 0.111331856  | 0.753622997  | 0.114755697  | -0.098583496 |
| Soil WC          | 0.843821733 | -0.124203841 | -0.415628277 | -0.087398817 | -0.021670303 |
| Soil pH          | 0.068389758 | 0.794001662  | -0.200996436 | 0.247217601  | 0.226739269  |
| Soil Ec          | 0.568393102 | 0.540578085  | 0.453887649  | -0.126697032 | -0.224293954 |



**Table S9** Site scores of the soil PCA

|       | Site | Region | PC1      | PC2      | PC3       | PC4      | PC5      | PC6      |
|-------|------|--------|----------|----------|-----------|----------|----------|----------|
| sit1  | HN   |        | -0.72595 | 0.28799  | 0.334746  | 0.17289  | 1.63856  | 1.22785  |
| sit2  | YTL  |        | 1.26143  | 0.64481  | 0.252156  | -0.62634 | -0.68378 | -0.54803 |
| sit3  | REG  |        | -0.26035 | -0.21965 | 0.76542   | -1.05542 | -1.25369 | 0.0943   |
| sit4  | QL   |        | -1.33971 | -0.6523  | 0.601135  | -1.02064 | 0.55014  | 0.06746  |
| sit5  | MT   |        | -0.14804 | -0.69702 | -0.633402 | -1.03997 | 0.92273  | 0.11591  |
| sit6  | TD   |        | 0.46061  | 0.60948  | 0.013844  | -0.24643 | -0.37118 | 0.30562  |
| sit7  | HK   |        | -0.70163 | 0.08509  | 0.945926  | 1.05185  | 0.08749  | -1.24512 |
| sit8  | SD   |        | 0.183    | 0.56206  | 0.171867  | -0.32891 | 0.34878  | 0.09953  |
| sit9  | GH   |        | 0.03596  | 0.22331  | 0.218977  | -0.58539 | -0.02117 | -0.27394 |
| sit10 | HY   | QT     | 1.41231  | 0.79821  | -0.004262 | -0.20048 | 0.66737  | -1.70381 |
| sit11 | SN   |        | -0.51039 | 0.46561  | 0.858663  | -0.02378 | 0.29115  | -0.37844 |
| sit12 | TK   |        | 0.06963  | -0.90871 | 0.653799  | 1.06371  | -1.21614 | 1.2438   |
| sit13 | TZ   |        | -0.63138 | 0.55355  | 0.666559  | -0.17008 | -1.31339 | -0.53645 |
| sit14 | LQ   |        | -0.37971 | -0.36189 | 0.420216  | -0.41891 | -0.76231 | -0.36504 |
| sit15 | GC   |        | -0.3208  | -0.24933 | -0.013302 | -1.9032  | 0.88034  | -0.08703 |
| sit16 | HZ   |        | -0.08064 | -0.11308 | 0.151405  | 1.31843  | 0.12866  | -0.0341  |
| sit17 | HC   |        | 0.07394  | 0.03278  | -0.075225 | -0.19476 | 1.07398  | -0.15652 |
| sit18 | YD   |        | -0.51269 | -0.98259 | 0.234836  | 1.70638  | 0.41028  | -1.78272 |
| sit19 | ZK   |        | -0.46228 | 0.00684  | 0.228315  | 0.60301  | 1.08615  | 0.48702  |
| sit20 | BYH  |        | 1.20031  | -1.07116 | -0.427407 | 0.29643  | -0.50788 | 0.48178  |
| sit21 | TPSQ |        | 0.55071  | -1.02848 | -0.35814  | 0.05731  | 0.39571  | -0.69059 |
| sit22 | DL   |        | -0.33942 | 1.03592  | -0.207553 | -0.5125  | -0.92422 | -0.20775 |
| sit23 | SU   |        | 1.29909  | 0.10922  | 0.017856  | -0.13811 | -0.79704 | 0.08999  |
| sit24 | SGDL | IM     | -0.2596  | 1.06852  | -0.150545 | 0.85998  | -0.21535 | 0.71363  |
| sit25 | XWQ  |        | 1.78154  | 0.68628  | -0.643096 | 0.4511   | 1.0474   | 0.87793  |
| sit26 | GY   |        | -0.66308 | 1.7524   | -0.05152  | 0.75093  | -0.14649 | 1.19817  |
| sit27 | BYXL |        | -1.33424 | 0.2378   | -3.479361 | 0.11844  | -0.71105 | -0.58571 |
| sit28 | HTXL |        | 0.58751  | -1.54605 | -0.482117 | 0.41235  | -0.16405 | 0.32864  |
| sit29 | FYD  |        | -0.24612 | -1.3296  | -0.009788 | -0.39788 | -0.441   | 1.26361  |

**Figure S1.** Heat map of Pearson correlations among *S. chamaejasme* leaf P content, soil P and AP content, soil water content (SWC), mean annual precipitation (MAP), and altitude (ALT) in IM region

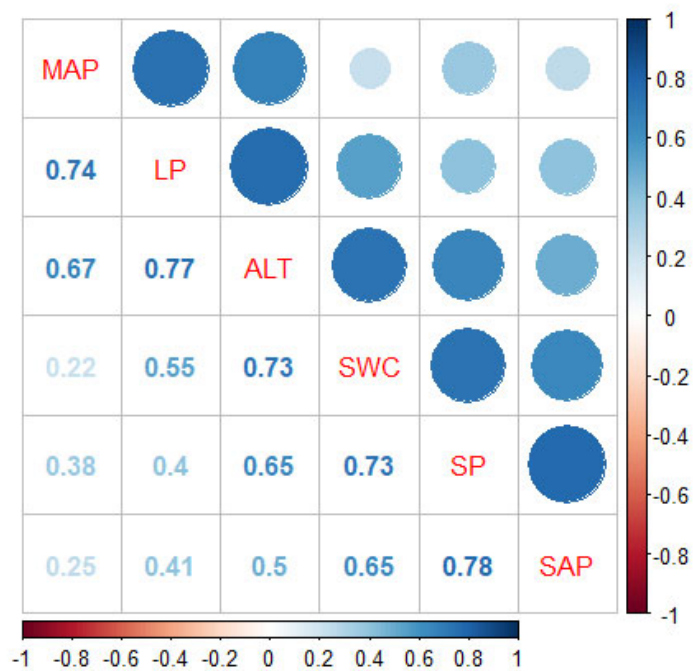

**Figure S2.** Biplot for the first two axes of soil physicochemical properties

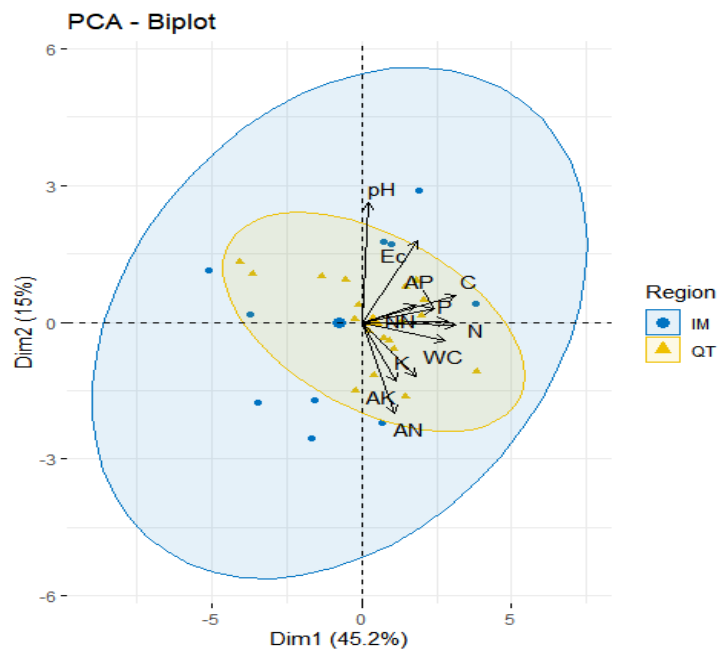

Supplement: s1 [file s1]
